# Supplementary material for: Distribution and predictors of wing shape and size variability in three sister species of solitary bees
Source: PubMed Central journal article supplement (PMC5342212; doi:10.1371/journal.pone.0173109), 2017-03-08
Supplement: pone.0173109.s001.pdf [file pone.0173109.s001.pdf]

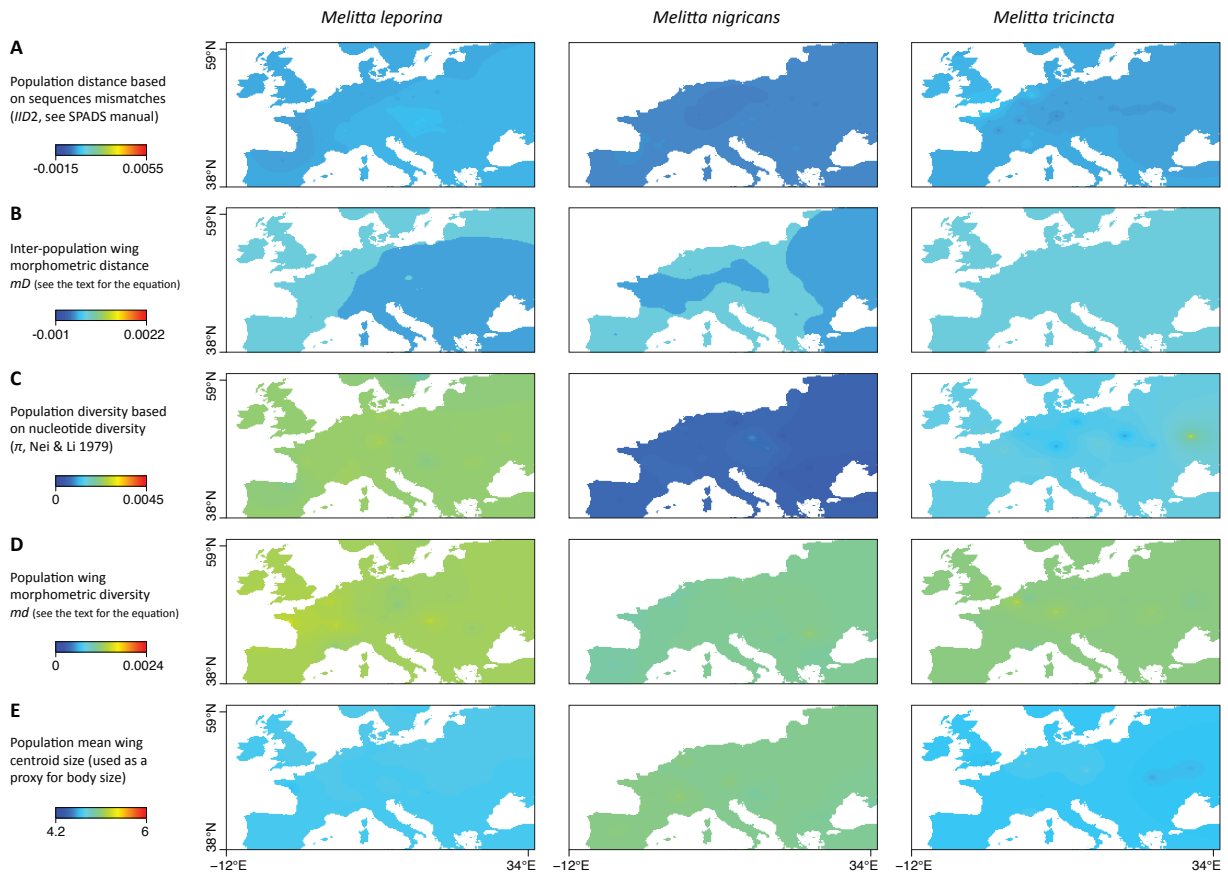

**Fig A.** Interpolation graphs generated with a distance weighting parameter  $\alpha = 1$ : population genetic distance based on DNA sequence mismatches ( $IID2$ ; **A**), Inter-population morphometric distance ( $mD$ ; **B**), population nucleotide diversity ( $\pi$ ; **C**), population morphometric diversity ( $md$ ; **D**) and population mean wing centroid size ( $wsM$ ; used as a proxy for body size; **E**).

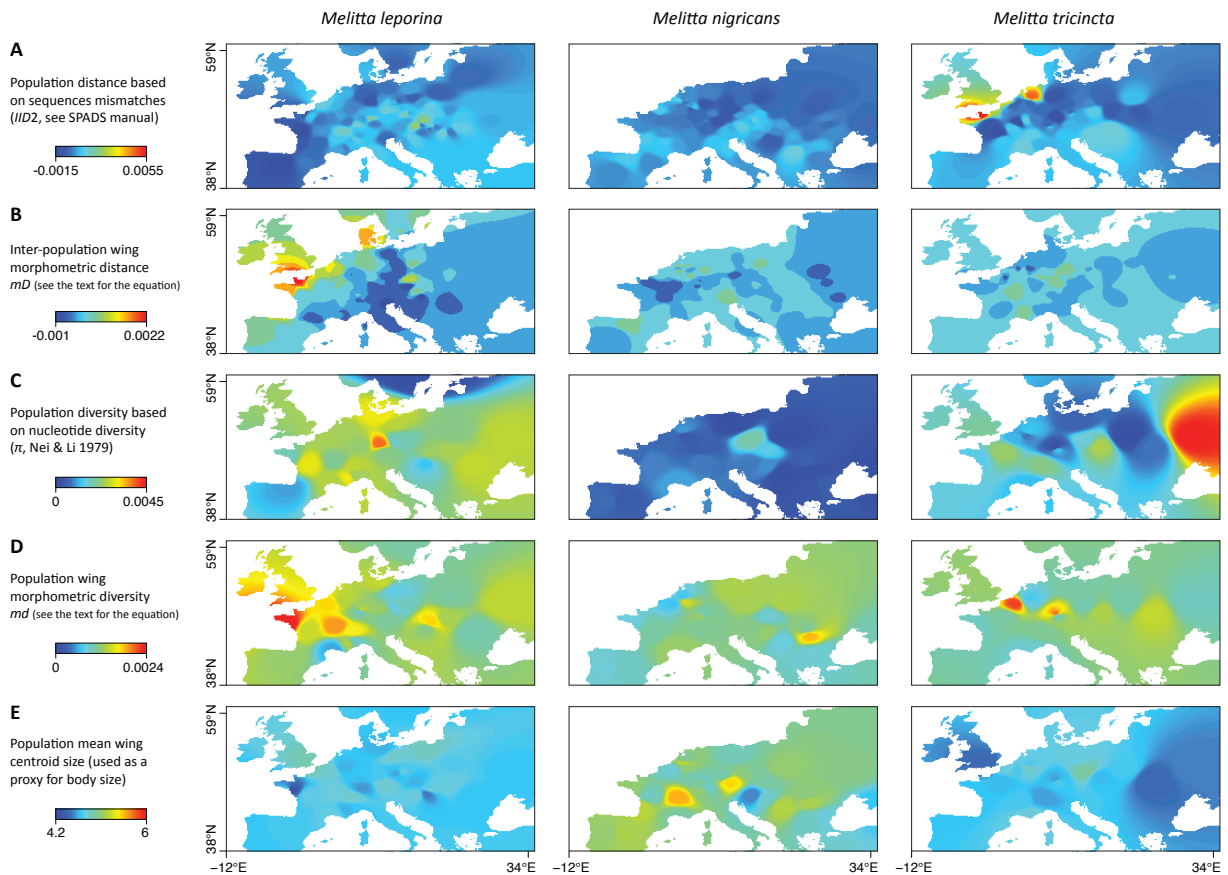

**Fig B.** Interpolation graphs generated with a distance weighting parameter  $\alpha = 10$ : population genetic distance based on DNA sequence mismatches ( $IID2$ ; **A**), Inter-population morphometric distance ( $mD$ ; **B**), population nucleotide diversity ( $\pi$ ; **C**), population morphometric diversity ( $md$ ; **D**) and population mean wing centroid size ( $wsM$ ; used as a proxy for body size; **E**).

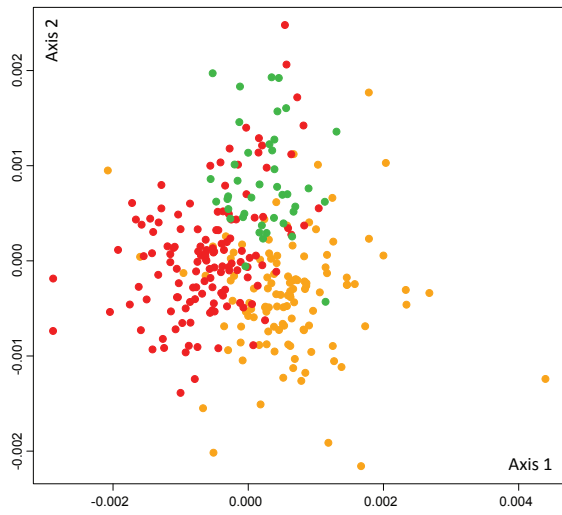

**Fig C. PCoA (principal component analysis) performed on the overall matrix of estimated morphological distances.** The dots are coloured according to the three species: *M. leporina* (orange), *M. nigricans* (red) and *M. tricincta* (green).

**Table A. Sampling localities of *Melitta leporina*, *nigricans* and *tricornata*** (see Table S2 in Dellicour *et al.* [2015] for more details about the genetic data available for each sampled population). “*n* (COI)” refers to the number of sampled individuals sequenced at the mitochondrial locus COI and “*n* (morpho)” refers to the number of sampled individuals for which morphometric data were generated.

| Population Locality             | Geographical coordinates | <i>n</i> (COI) | <i>n</i> (morph) | Population Locality             | Geographical coordinates | <i>n</i> (COI) | <i>n</i> (morph) | Population Locality         | Geographical coordinates | <i>n</i> (COI) | <i>n</i> (morph) |   |   |
|---------------------------------|--------------------------|----------------|------------------|---------------------------------|--------------------------|----------------|------------------|-----------------------------|--------------------------|----------------|------------------|---|---|
| <b><i>Melitta leporina</i></b>  |                          |                |                  |                                 |                          |                |                  |                             |                          |                |                  |   |   |
| Mons (Belgium)                  | 50.46°N, 3.96°E          | 3              | 3                | <b><i>Melitta nigricans</i></b> |                          |                |                  |                             |                          |                |                  | 5 | 5 |
| Beroun (Czech Republic)         | 49.97°N, 14.07°E         | 4              | 3                | Erbisoeul (Belgium)             | 50.52°N, 3.92°E          | 5              | 5                | Boussoit (Belgium)          | 50.47°N, 4.08°E          | 2              | 3                |   |   |
| Chvalské Skály (Czech Republic) | 50.11°N, 14.60°E         | 1              | 1                | Beli Osam (Bulgaria)            | 42.86°N, 24.67°E         | 7              | 9                | Boří (Czech Republic)       | 49.28°N, 16.63°E         | 4              | 9                |   |   |
| Prague (Czech Republic)         | 50.11°N, 14.42°E         | 5              | 4                | Smyadovo (Bulgaria)             | 43.03°N, 27.05°E         | 7              | 11               | Klánovický (Czech Republic) | 50.08°N, 14.67°E         | 3              | 6                |   |   |
| Pegwell Bay (England)           | 51.30°N, 1.37°E          | 2              | 1                | Kolin (Czech Republic)          | 50.05°N, 15.21°E         | 1              | 5                | Surrey (England)            | 51.25°N, 0.47°W          | 3              | 8                |   |   |
| Arles (France)                  | 43.64°N, 4.58°E          | 3              | 6                | Na Plachtě (Czech Republic)     | 50.18°N, 15.85°E         | 3              | 12               | Essonne (France)            | 48.45°N, 2.15°E          | 11             | 8                |   |   |
| Barcelonnette (France)          | 44.38°N, 6.61°E          | 3              | 3                | Arles (France)                  | 43.64°N, 4.58°E          | 7              | 8                | Gonfaron (France)           | 43.32°N, 6.35°E          | 8              | 15               |   |   |
| Batz sur Mer (France)           | 47.28°N, 2.48°W          | 2              | 2                | Cap Ferret (France)             | 44.78°N, 1.15°W          | 2              | 1                | Lille (France)              | 50.65°N, 3.04°E          | 1              | 1                |   |   |
| Donges (France)                 | 47.32°N, 2.07°W          | 1              | 2                | Les Grandes Bruyères (France)   | 46.15°N, 4.74°E          | 2              | 2                | Rillieux-la-Pape (France)   | 45.80°N, 4.90°E          | 3              | 1                |   |   |
| Poitiers (France)               | 46.55°N, 0.41°E          | 10             | 13               | Poitiers (France)               | 48.67°N, 0.34°E          | 4              | 8                | Saint-Lyphard (France)      | 47.40°N, 2.31°W          | 7              | 8                |   |   |
| Puligny-Montrachet (France)     | 46.95°N, 4.77°E          | 2              | 3                | Achern (Germany)                | 48.64°N, 8.06°E          | 5              | 5                | Berlin (Germany)            | 52.60°N, 13.16°E         | 7              | 10               |   |   |
| Berlin (Germany)                | 52.45°N, 13.56°E         | 2              | 2                | Berlin (Germany)                | 52.45°N, 13.33°E         | 3              | 2                | Giengen (Germany)           | 48.63°N, 10.25°E         | 4              | 3                |   |   |
| Dorfen (Germany)                | 48.28°N, 12.15°E         | 2              | 2                | Gerzen (Germany)                | 48.51°N, 12.43°E         | 2              | 1                | Onatsfeld (Germany)         | 48.87°N, 10.08°E         | 3              | 5                |   |   |
| Heidelberg (Germany)            | 49.40°N, 8.68°E          | 2              | 4                | Reichenschwad (Germany)         | 49.51°N, 11.38°E         | 2              | 2                | Maarland (Holland)          | 50.79°N, 5.70°E          | 3              | 9                |   |   |
| Klinken (Germany)               | 53.49°N, 11.67°E         | 3              | 3                | Webenheim (Germany)             | 49.25°N, 7.28°E          | 1              | 2                | Merum (Holland)             | 51.17°N, 5.94°E          | 2              | 3                |   |   |
| Reilingen (Germany)             | 49.29°N, 8.58°E          | 5              | 4                | Winkel (Germany)                | 48.83°N, 8.31°E          | 4              | 7                | Zakrzów (Poland)            | 50.48°N, 20.53°E         | 8              | 6                |   |   |
| Biesland (Holland)              | 50.83°N, 5.69°E          | 2              | 3                | Eindhoven (Holland)             | 51.42°N, 5.48°E          | 4              | 4                | Brigerbad (Switzerland)     | 46.30°N, 7.92°E          | 4              | 16               |   |   |
| Budapest (Hungary)              | 47.57°N, 19.13°E         | 2              | 2                | Gronsveld (Holland)             | 50.81°N, 5.73°E          | 4              | 7                | Kiev (Ukraine)              | 50.40°N, 30.54°E         | 8              | 4                |   |   |
| Rakamaz (Hungary)               | 48.13°N, 21.46°E         | 5              | 5                | Neder-Betuwe (Holland)          | 51.94°N, 5.62°E          | 1              | 1                | Tiaziv (Ukraine)            | 49.02°N, 24.70°E         | 8              | 6                |   |   |
| Simontornya (Hungary)           | 46.75°N, 18.53°E         | 3              | 4                | Szigetvár (Hungary)             | 46.05°N, 17.86°E         | 10             | 14               |                             |                          |                |                  |   |   |
| Szentendrej (Hungary)           | 47.66°N, 19.07°E         | 3              | 3                | Pinczow (Poland)                | 50.50°N, 20.47°E         | 7              | 4                |                             |                          |                |                  |   |   |
| Zalászabar (Hungary)            | 46.64°N, 17.11°E         | 1              | 1                | Cârtișoara (Romania)            | 45.68°N, 24.58°E         | 2              | 2                |                             |                          |                |                  |   |   |
| Piemont (Italy)                 | 44.69°N, 7.60°E          | 8              | 8                | Târnăveni (Romania)             | 46.44°N, 24.25°E         | 12             | 22               |                             |                          |                |                  |   |   |
| Dorposz Szlachecki (Poland)     | 53.29°N, 18.43°E         | 1              | 1                | Belgrade (Serbia)               | 44.78°N, 20.37°E         | 7              | 4                |                             |                          |                |                  |   |   |
| Putawy (Poland)                 | 51.42°N, 21.97°E         | 8              | 9                | Rajčany (Slovakia)              | 48.61°N, 18.23°E         | 5              | 9                |                             |                          |                |                  |   |   |
| Zetea (Romania)                 | 46.39°N, 25.37°E         | 8              | 8                | Savci (Slovenia)                | 46.48°N, 16.06°E         | 5              | 7                |                             |                          |                |                  |   |   |
| Sekule (Slovakia)               | 48.60°N, 17.00°E         | 1              | 1                | Aguilar de Campoo (Spain)       | 40.79°N, 4.29°W          | 8              | 12               |                             |                          |                |                  |   |   |
| Amorebieta (Spain)              | 43.18°N, 2.63°W          | 10             | 10               | Alba de Tormes (Spain)          | 40.82°N, 5.52°W          | 8              | 10               |                             |                          |                |                  |   |   |
| Vegas de Matute (Spain)         | 40.79°N, 4.18°W          | 1              | 2                | Aesch (Switzerland)             | 47.26°N, 8.23°E          | 5              | 8                |                             |                          |                |                  |   |   |
| Uppsala (Sweden)                | 59.69°N, 17.68°E         | 5              | 2                | Frauenfeld (Switzerland)        | 47.57°N, 8.92°E          | 1              | 3                |                             |                          |                |                  |   |   |
| Diessenhofen (Switzerland)      | 47.68°N, 8.76°E          | 2              | 1                | Crimea (Ukraine)                | 44.87°N, 34.22°E         | 6              | 5                |                             |                          |                |                  |   |   |
| Sion (Switzerland)              | 46.21°N, 7.39°E          | 2              | 2                | Kiev (Ukraine)                  | 50.33°N, 30.47°E         | 3              | 1                |                             |                          |                |                  |   |   |
| Kiev (Ukraine)                  | 50.33°N, 30.47°E         | 8              | 8                | Camoël (France)                 | 47.48°N, 2.40°W          | 3              | 9                |                             |                          |                |                  |   |   |

**Table B. For each pair of species, correlation statistics between intra-population morphometric diversity**

|                                              | Linear regression |         |                 |
|----------------------------------------------|-------------------|---------|-----------------|
|                                              | <i>r</i>          | $\beta$ | <i>p</i> -value |
| <i>M. leporina</i> vs. <i>M. nigricans</i>   | -0.567            | -1.010  | 0.322           |
| <i>M. nigricans</i> vs. <i>M. tricornata</i> | -0.357            | -0.240  | 0.127           |
| <i>M. leporina</i> vs. <i>M. tricornata</i>  | 0.180             | 0.129   | 0.012           |

values. As these species were not sampled at the exact same locations, these correlation statistics were based on values extracted from interpolation graphs at the same locations. To avoid as much extrapolation as possible, we only considered morphometric diversity values reported for sampling localities. In practice, *md* values were extracted from the corresponding interpolation maps (Fig 3B, maps generated with a distance weighting parameter  $\alpha = 5$ ) with the combined set of sampling geographic coordinates of all the three species (total of 83 localities). *r*,  $\beta$  and  $R^2$  respectively refer to Pearson's correlation coefficient, linear regression beta weight and determination coefficient (reported with their *p*-value).

**Table C. MRDM/LR results and additional parameters derived from CA for different response variables:** Pearson's correlation coefficient  $r$ , beta weights  $\beta$ , as well as unique, common and total contributions (U, C and T) of environmental distances to the variance in the dependent variable. (\*) indicates significant  $\beta$  coefficient values (p-values <0.05 after Benjamini-Hochberg correction).

|                                                                                       | $r$    | $\beta$ | U     | C      | T     | $r$                                                       | $\beta$ | U     | C      | T     |
|---------------------------------------------------------------------------------------|--------|---------|-------|--------|-------|-----------------------------------------------------------|---------|-------|--------|-------|
| <b>MRDM-CA, response variable: inter-pop. morphometric distance (<math>mD</math>)</b> |        |         |       |        |       | <b>inter-pop. wing size difference (<math>wsD</math>)</b> |         |       |        |       |
| <b><i>Melitta leporina</i></b>                                                        |        |         |       |        |       | MRDM $R^2 = 0.089$ (p-value = 0.001)                      |         |       |        |       |
| Inter-pop. morphometric distance ( $mD$ )                                             | -      | -       | -     | -      | -     | 0.121                                                     | 0.153*  | 0.022 | -0.007 | 0.015 |
| Inter-pop. wing size difference ( $wsD$ )                                             | 0.121  | 0.160*  | 0.023 | -0.008 | 0.015 | -                                                         | -       | -     | -      | -     |
| Geographical distance                                                                 | 0.114  | 0.089   | 0.006 | 0.007  | 0.013 | 0.122                                                     | 0.214*  | 0.038 | -0.023 | 0.015 |
| Genetic distance ( $IID2$ )                                                           | 0.207  | 0.234*  | 0.048 | -0.005 | 0.043 | -0.237                                                    | -0.318* | 0.093 | -0.036 | 0.056 |
| Elevation difference                                                                  | -0.022 | -0.038  | 0.001 | -0.001 | 0.001 | -0.018                                                    | -0.031  | 0.001 | -0.001 | 0.000 |
| Annual mean temperature difference                                                    | -0.092 | -0.107* | 0.010 | -0.002 | 0.008 | -0.063                                                    | -0.106* | 0.010 | -0.006 | 0.004 |
| Annual precipitation difference                                                       | 0.004  | 0.041   | 0.002 | -0.002 | 0.000 | -0.048                                                    | -0.116* | 0.012 | -0.010 | 0.002 |
| <b><i>Melitta nigricans</i></b>                                                       |        |         |       |        |       | MRDM $R^2 = 0.056$ (p-value = 0.001)                      |         |       |        |       |
| Inter-pop. morphometric distance ( $mD$ )                                             | -      | -       | -     | -      | -     | 0.045                                                     | 0.040   | 0.002 | 0.001  | 0.002 |
| Inter-pop. wing size difference ( $wsD$ )                                             | 0.045  | 0.039   | 0.002 | 0.001  | 0.002 | -                                                         | -       | -     | -      | -     |
| Geographical distance                                                                 | -0.071 | -0.136* | 0.016 | -0.011 | 0.005 | 0.007                                                     | 0.021   | 0.000 | 0.000  | 0.000 |
| Genetic distance ( $IID2$ )                                                           | 0.057  | 0.058   | 0.003 | 0.000  | 0.003 | 0.181                                                     | 0.194*  | 0.036 | -0.003 | 0.033 |
| Elevation difference                                                                  | 0.144  | 0.142*  | 0.017 | 0.003  | 0.021 | -0.010                                                    | 0.002   | 0.000 | 0.000  | 0.000 |
| Annual mean temperature difference                                                    | 0.004  | 0.001   | 0.000 | 0.000  | 0.000 | -0.025                                                    | -0.072  | 0.005 | -0.004 | 0.001 |
| Annual precipitation difference                                                       | 0.153  | 0.134*  | 0.016 | 0.007  | 0.023 | -0.016                                                    | -0.028  | 0.001 | 0.000  | 0.000 |
| <b><i>Melitta tricincta</i></b>                                                       |        |         |       |        |       | MRDM $R^2 = 0.030$ (p-value = 0.678)                      |         |       |        |       |
| Inter-pop. morphometric distance ( $mD$ )                                             | -      | -       | -     | -      | -     | 0.142                                                     | 0.130   | 0.017 | 0.003  | 0.020 |
| Inter-pop. wing size difference ( $wsD$ )                                             | 0.142  | 0.144   | 0.019 | 0.002  | 0.020 | -                                                         | -       | -     | -      | -     |
| Geographical distance                                                                 | 0.013  | -0.016  | 0.000 | 0.000  | 0.000 | 0.192                                                     | 0.157   | 0.022 | 0.015  | 0.037 |
| Genetic distance ( $IID2$ )                                                           | 0.073  | 0.036   | 0.001 | 0.004  | 0.005 | 0.253                                                     | 0.213   | 0.043 | 0.021  | 0.064 |
| Elevation difference                                                                  | -0.047 | 0.027   | 0.001 | 0.002  | 0.002 | -0.092                                                    | -0.110  | 0.008 | 0.001  | 0.009 |
| Annual mean temperature difference                                                    | -0.047 | -0.019  | 0.000 | 0.002  | 0.002 | -0.026                                                    | -0.069  | 0.004 | -0.003 | 0.001 |
| Annual precipitation difference                                                       | -0.081 | -0.095  | 0.006 | 0.000  | 0.007 | 0.065                                                     | 0.174   | 0.021 | -0.017 | 0.004 |
| <b>LR-CA, response variable: population morphometric diversity (<math>md</math>)</b>  |        |         |       |        |       | <b>population mean wing size (<math>wsM</math>)</b>       |         |       |        |       |
| <b><i>Melitta leporina</i></b>                                                        |        |         |       |        |       | LR $R^2 = 0.184$ (p-value = 0.765)                        |         |       |        |       |
| Pop. morphometric diversity ( $md$ )                                                  | -      | -       | -     | -      | -     | 0.361                                                     | 0.204   | 0.084 | 0.046  | 0.130 |
| Pop. mean wing size ( $wsM$ )                                                         | 0.361  | 0.469   | 0.087 | 0.044  | 0.130 | -                                                         | -       | -     | -      | -     |
| Latitude                                                                              | -0.091 | 0.030   | 0.000 | 0.008  | 0.008 | -0.026                                                    | 0.401   | 0.037 | -0.030 | 0.007 |
| Longitude                                                                             | -0.251 | -0.090  | 0.002 | 0.061  | 0.063 | -0.026                                                    | 0.133   | 0.010 | 0.021  | 0.031 |
| Nucleotide diversity ( $\pi$ )                                                        | 0.078  | 0.052   | 0.002 | 0.004  | 0.006 | 0.183                                                     | 0.160   | 0.043 | -0.010 | 0.033 |
| Elevation                                                                             | 0.005  | -0.108  | 0.001 | -0.001 | 0.000 | 0.207                                                     | 0.293   | 0.023 | -0.023 | 0.000 |
| Annual mean temperature                                                               | 0.136  | -0.042  | 0.000 | 0.018  | 0.019 | -0.053                                                    | 0.421   | 0.040 | -0.017 | 0.023 |
| Annual precipitation                                                                  | 0.257  | 0.209   | 0.014 | 0.052  | 0.066 | -0.206                                                    | 0.119   | 0.010 | 0.015  | 0.025 |
| <b><i>Melitta nigricans</i></b>                                                       |        |         |       |        |       | LR $R^2 = 0.178$ (p-value = 0.845)                        |         |       |        |       |
| Pop. morphometric diversity ( $md$ )                                                  | -      | -       | -     | -      | -     | 0.072                                                     | 0.065   | 0.005 | 0.000  | 0.005 |
| Pop. mean wing size ( $wsM$ )                                                         | 0.072  | 0.099   | 0.005 | 0.000  | 0.005 | -                                                         | -       | -     | -      | -     |
| Latitude                                                                              | 0.209  | 0.561   | 0.017 | 0.026  | 0.044 | -0.008                                                    | 0.314   | 0.008 | -0.007 | 0.001 |
| Longitude                                                                             | 0.226  | 0.342   | 0.020 | 0.031  | 0.051 | -0.304                                                    | -0.248  | 0.015 | 0.102  | 0.117 |
| Nucleotide diversity ( $\pi$ )                                                        | -0.157 | -0.065  | 0.003 | 0.021  | 0.025 | -0.083                                                    | -0.111  | 0.014 | -0.007 | 0.007 |
| Elevation                                                                             | 0.044  | 0.414   | 0.014 | -0.012 | 0.002 | 0.102                                                     | 0.278   | 0.009 | 0.031  | 0.040 |
| Annual mean temperature                                                               | -0.364 | 0.189   | 0.002 | 0.131  | 0.133 | 0.051                                                     | 0.127   | 0.001 | -0.001 | 0.000 |
| Annual precipitation                                                                  | 0.017  | 0.054   | 0.002 | -0.001 | 0.000 | 0.065                                                     | -0.117  | 0.011 | 0.006  | 0.017 |
| <b><i>Melitta tricincta</i></b>                                                       |        |         |       |        |       | LR $R^2 = 0.330$ (p-value = 0.768)                        |         |       |        |       |
| Pop. morphometric diversity ( $md$ )                                                  | -      | -       | -     | -      | -     | -0.320                                                    | -0.466  | 0.173 | -0.071 | 0.102 |
| Pop. mean wing size ( $wsM$ )                                                         | -0.320 | -0.472  | 0.189 | -0.087 | 0.102 | -                                                         | -       | -     | -      | -     |
| Latitude                                                                              | 0.079  | 0.921   | 0.052 | -0.045 | 0.006 | 0.005                                                     | 1.050   | 0.064 | -0.064 | 0.000 |
| Longitude                                                                             | -0.014 | 0.187   | 0.008 | -0.008 | 0.000 | -0.222                                                    | 0.274   | 0.016 | 0.018  | 0.033 |
| Nucleotide diversity ( $\pi$ )                                                        | -0.237 | -0.286  | 0.068 | -0.012 | 0.056 | -0.293                                                    | -0.292  | 0.066 | 0.020  | 0.086 |
| Elevation                                                                             | 0.200  | 1.117   | 0.074 | -0.034 | 0.040 | -0.206                                                    | 1.207   | 0.082 | -0.055 | 0.028 |
| Annual mean temperature                                                               | -0.169 | 1.138   | 0.044 | -0.016 | 0.028 | 0.306                                                     | 1.536   | 0.079 | 0.004  | 0.083 |
| Annual precipitation                                                                  | 0.006  | 0.090   | 0.002 | -0.002 | 0.000 | -0.155                                                    | 0.114   | 0.003 | 0.018  | 0.022 |
